# Supplementary material for: Novel Chlamydia species isolated from snakes are temperature-sensitive and exhibit decreased susceptibility to azithromycin
Source: PubMed Central journal article supplement (PMC5884828; doi:10.1038/s41598-018-23897-z), 2018-04-04
Supplement: 41598_2018_23897_MOESM1_ESM.pdf [file 41598_2018_23897_MOESM1_ESM.pdf]

**Novel *Chlamydia* species isolated from snakes are temperature-sensitive and exhibit decreased susceptibility to azithromycin**

Eveline Staub, Hanna Marti, Roberta Biondi, Aurora Levi, Manuela Donati, Cory A. Leonard, Serej D. Ley, Trestan Pillonel, Gilbert Greub, Helena M.B. Seth-Smith, Nicole Borel

**Supplementary Figure 1. Growth curves of *C. pneumoniae* K6 and snake isolates at 24, 32, 40 and 48 hours post infection (hpi)**

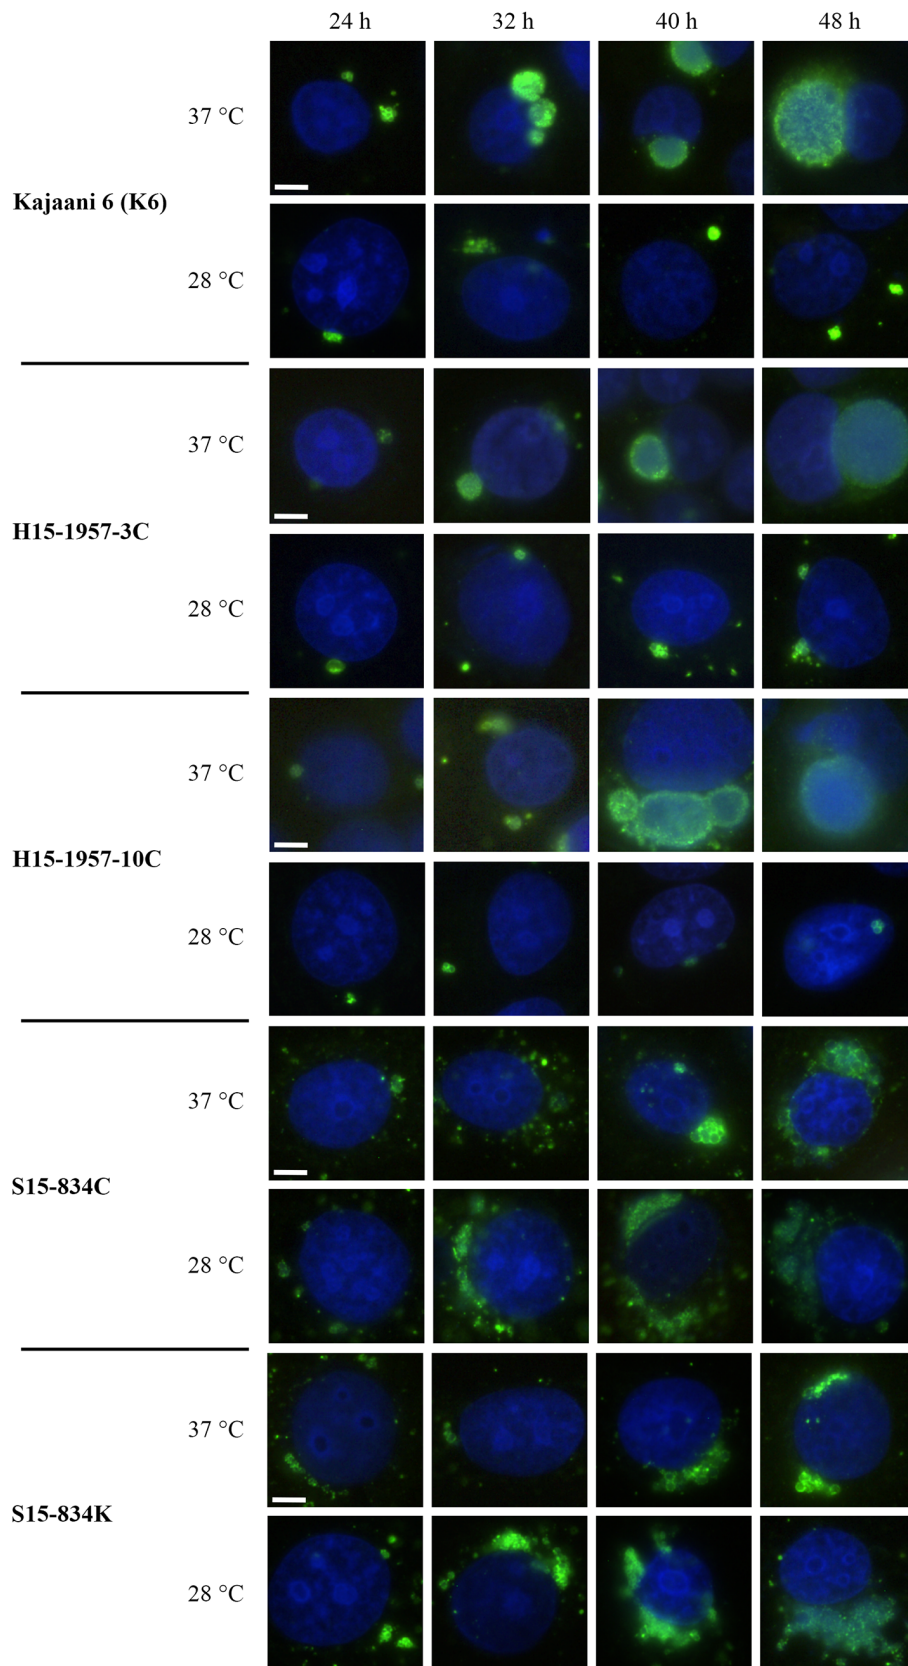

Shown are representative immunofluorescence images illustrating the morphology of *C. pneumoniae* K6, H15-1957-3C, H15-1957-10C, S15-834C and S15-834K (top to bottom) at 24 (column 1), 32 (column 2), 40 (column 3) and 48 (column 4) hpi at 37 °C (top line per strain; lines 1, 3, 5, 7, 9) and 28 °C (bottom lane per strain; lines 2, 4, 6, 8, 10). The size bar indicates 5 µm. Chlamydial inclusions are shown in green, the LLC-MK2 nuclei (DAPI) are shown in blue.

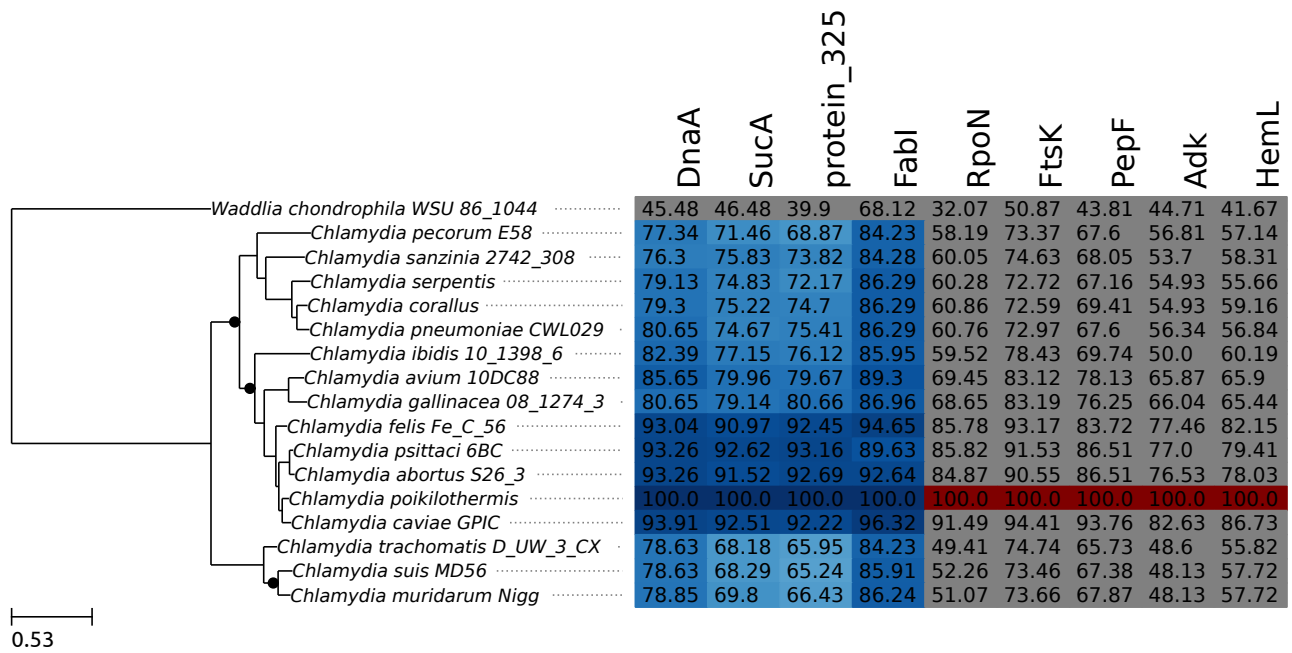

**Figure S2a:** Conservation of nine taxonomic markers as compared to *C. poikilothermis* amino acid sequences (in percent identity). DnaA, SucA, protein 325 and FabI are used to delineate species of the same genus (in blue). RpoN, FtsK, PepF, Adk and HemL are used to discriminate species (in red). The low conservation of RpoN, FtsK, PepF, Adk and HemL support the classification of *C. poikilothermis* as a new species of the genus *Chlamydia*.

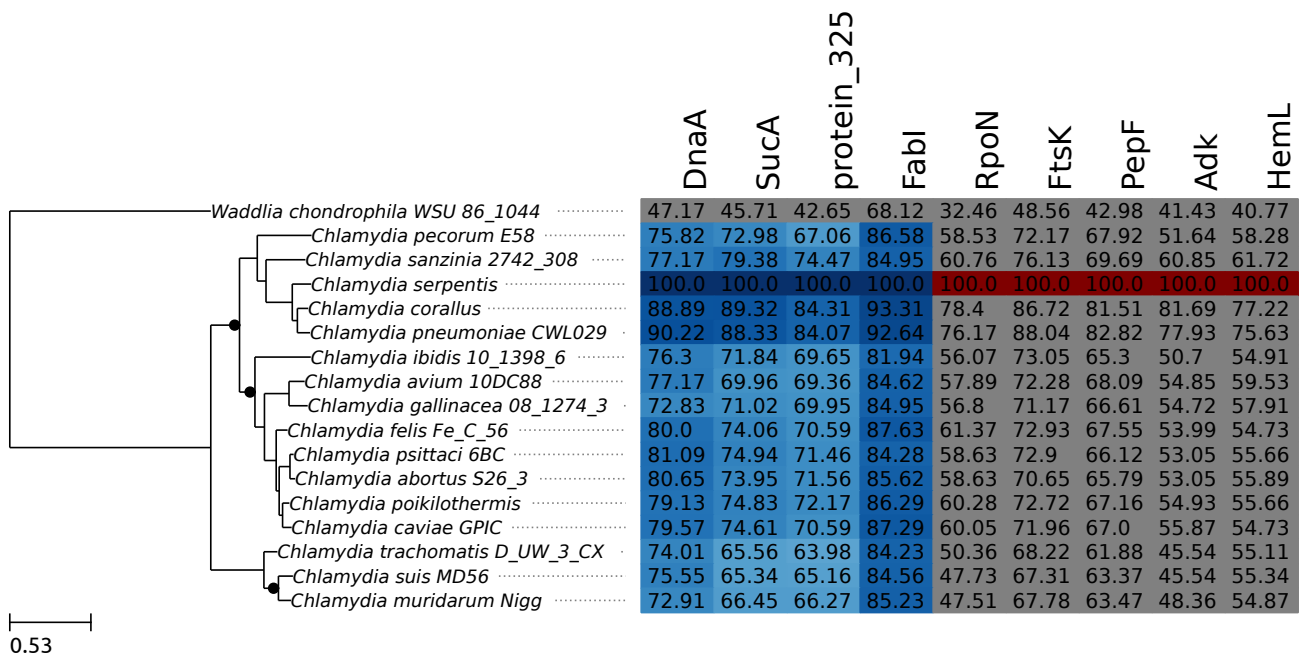

**Figure S2b:** Conservation of nine taxonomic markers as compared to *C. serpentis* amino acid sequences (in percent identity). DnaA, SucA, protein 325 and FabI are used to delineate species of the same genus (in blue). RpoN, FtsK, PepF, Adk and HemL are used to discriminate species (in red). The low conservation of RpoN, FtsK, PepF, Adk and HemL support the classification of *C. serpentis* as a new species of the genus *Chlamydia*.

1 **Supplementary Tables**

2 **Supplementary Table S1**

3 Sequencing statistics of strains sequenced in this study.

4

| <b><i>C.pneumoniae</i> locus tag</b> | <b>Putative function</b>     | <b><i>C. serpentis</i> locus tag</b> | <b>Putative function</b>                                   | <b>presence in other genome</b> |
|--------------------------------------|------------------------------|--------------------------------------|------------------------------------------------------------|---------------------------------|
| <i>CPn_0008-12</i>                   | hypotheticals                |                                      |                                                            | tandem gene duplication         |
| <i>CPn_0013, Cpn_0018-9</i>          | pmp                          |                                      |                                                            | tandem gene duplication         |
| <i>Cpn_0041-47</i>                   | hypotheticals                |                                      |                                                            | absent                          |
| <i>Cpn_0049</i>                      | hypothetical                 |                                      |                                                            | absent                          |
| <i>CPn_0063-4</i>                    | hypotheticals                |                                      |                                                            | absent                          |
| <i>CPn_0069</i>                      | hypothetical                 |                                      |                                                            | absent                          |
| <i>CPn_0124-6</i>                    | hypotheticals                |                                      |                                                            | absent                          |
|                                      |                              | <i>C10C_0115</i>                     | hypothetical                                               | absent                          |
| <i>CPn_0142-3</i>                    | hypotheticals                |                                      |                                                            | absent                          |
| <i>CPn_0155-6</i>                    | hypotheticals                |                                      |                                                            | absent                          |
|                                      |                              | <i>C10C_0138</i>                     | hypothetical                                               | absent                          |
|                                      |                              | <i>C10C_0140-1</i>                   | conserved hypothetical, DUF648                             | tandem gene duplication         |
|                                      |                              | <i>C10C_0144</i>                     | hypothetical                                               | absent                          |
|                                      |                              | <i>C10C_0146</i>                     | conserved hypothetical, DUF648                             | tandem gene duplication         |
|                                      |                              | <i>C10C_0148</i>                     | IncA family                                                | tandem gene duplication         |
| <i>CPn_0173</i>                      | hypothetical                 |                                      |                                                            | absent                          |
|                                      |                              | <i>C10C_0165</i>                     | conserved hypothetical, DUF648                             | absent                          |
| <i>CPn_0196 (oppA_2)</i>             | Oligopeptide Binding Protein |                                      |                                                            | tandem gene duplication         |
| <i>CPn_0210-5</i>                    | hypotheticals                | <i>C10C_0183-7</i>                   | IncA family; conserved hypotheticals, DUF648; hypothetical | replacement                     |
| <i>CPn_0220-2</i>                    | hypotheticals                |                                      |                                                            | tandem gene duplication         |
|                                      |                              | <i>C10C_0216</i>                     | hypothetical                                               | tandem gene duplication         |
| <i>CPn_0256-9</i>                    | hypotheticals                |                                      |                                                            | tandem gene duplication         |
|                                      |                              | <i>C10C_0320</i>                     | conserved hypothetical, DUF1389                            | tandem gene duplication         |
| <i>CPn_0358</i>                      | hypothetical                 |                                      |                                                            | absent                          |
|                                      |                              | <i>C10C_0334</i>                     | hypothetical                                               | c                               |
| <i>CPn_0369-70</i>                   | hypotheticals                |                                      |                                                            | tandem gene duplication         |
|                                      |                              | <i>C10C_0337</i>                     | hypothetical                                               | absent                          |
|                                      |                              | <i>C10C_0384</i>                     | conserved hypothetical, DUF648                             | absent                          |
| <i>CPn_0492-4</i>                    | hypotheticals                |                                      |                                                            | absent                          |
|                                      |                              | <i>C10C_0536</i>                     | hypothetical                                               | replacement                     |

|                   |               |                    |                                                |                         |
|-------------------|---------------|--------------------|------------------------------------------------|-------------------------|
|                   |               | <i>C10C_0562</i>   | hypothetical                                   | replacement             |
|                   |               | <i>C10C_0645</i>   | hypothetical                                   | tandem gene duplication |
| <i>CPn_0798</i>   | hypothetical  |                    |                                                | tandem gene duplication |
|                   |               | <i>C10C_0798-9</i> | hypotheticals                                  | tandem gene duplication |
| <i>CPn_0831</i>   | hypothetical  |                    |                                                | absent                  |
| <i>CPn_0881-2</i> | hypotheticals |                    |                                                | absent                  |
| <i>CPn_0930</i>   | hypothetical  |                    |                                                | absent                  |
| <i>CPn_0978</i>   | hypothetical  |                    |                                                | tandem gene duplication |
| <i>CPn_1054-6</i> | hypotheticals | <i>C10C_1026-8</i> | conserved hypotheticals, DUF1978; hypothetical | replacement             |

5  
6  
7  
8  
9  
10  
11  
12  
13  
14  
15  
16  
17  
18  
19  
20  
21  
22  
23  
24  
25  
26  
27

28 **Supplementary Table S2**29 Whole gene differences between the genomes of *C. pneumoniae* CWL029 and *C. serpentis* H15-1957-  
30 10C.

31

| <b>Species designation</b> | <b>Strain</b> | <b>Number reads sequence post trimming</b> | <b>Read coverage of chromosome mean <math>\pm</math> standard deviation</b> | <b>Read coverage of plasmid mean <math>\pm</math> standard deviation</b> |
|----------------------------|---------------|--------------------------------------------|-----------------------------------------------------------------------------|--------------------------------------------------------------------------|
| <i>C. serpentis</i>        | H15-1947-3C   | 226964                                     | 10 $\pm$ 4                                                                  | 108 $\pm$ 22                                                             |
|                            | H15-1957-10C  | 299978                                     | 30 $\pm$ 8                                                                  | 47 $\pm$ 13                                                              |
| <i>C. poikilothermis</i>   | S15-834C      | 1100343                                    | 127 $\pm$ 42                                                                | 201 $\pm$ 63                                                             |
|                            | S15-834K      | 1253605                                    | 118 $\pm$ 34                                                                | 100 $\pm$ 29                                                             |
| <i>C. pneumoniae</i>       | K6            | 2023565                                    | 50 $\pm$ 52                                                                 | No plasmid                                                               |

32

33

34

35

36

37

38

39

40

41

42

43

44

45

46

47

48

49

50 **Supplementary Table S3**

51 Finishing primers.

52

| <b>Primer name</b> | <b>Sequence 5'-3'</b> |
|--------------------|-----------------------|
| 10C_S7_f2          | gaattacgttccccagagca  |
| 10C_S7_f1          | gcacatgggctatttggtt   |
| 10C_S2_f1          | tgggctattggttggtgc    |
| 10C_S7_r1          | aagcccagaaaaggtcacag  |
| 10C_S7_r2          | aattgcgaacaagggtgaag  |
| 10C_72_f1          | cataacagaggctgcccaat  |
| 10C_72_r1          | tgtcagtacggcaccttcaa  |
| 10C_S2_r1          | atgtcagtacggcaccttca  |
| 10C_21_f1          | aagtagtgctgtgggctgct  |
| 10C_21_f2          | gtgggctgctgatcacttct  |
| 10C_21_r1          | cgcatgaattgccataaaa   |
| 10C_21_r2          | aacgaaagcaaggccattag  |
|                    |                       |
| 834C_S2_f1         | tattgaacgggttgtaggc   |
| 834C_S2_r1         | gggagcgacattgacagatt  |
| 834C_21_f1         | cagggtgtgctgtggaatg   |
| 834C_21_r1         | agagtgcaggggaggagaat  |
|                    |                       |
| K6_S1_f1           | tcctcctcctcctcccta    |
| K6_S1_r1           | tggcaggacaacacaaggta  |

53

54

55
